# Supplementary material for: A urinary extracellular vesicle microRNA biomarker discovery pipeline; from automated extracellular vesicle enrichment by acoustic trapping to microRNA sequencing
Source: PubMed Central journal article supplement (PMC6541292; doi:10.1371/journal.pone.0217507), 2019-05-29
Supplement: pone.0217507.s001.pdf [file pone.0217507.s001.pdf]

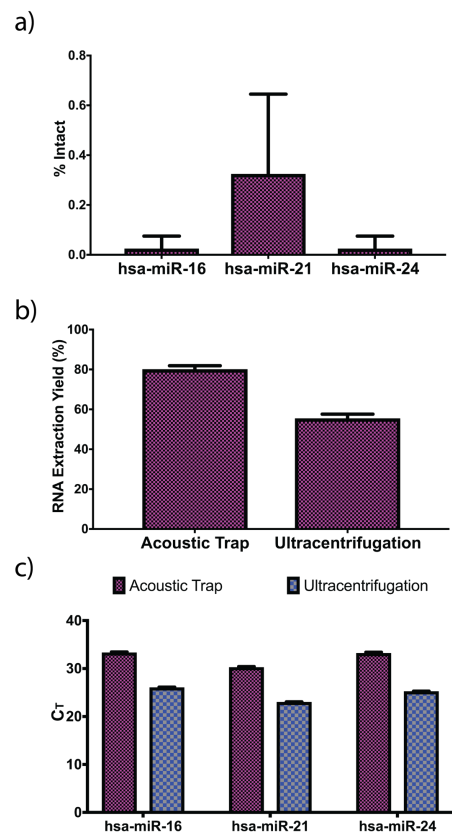

S1. Fig
