# Supplementary material for: A urinary extracellular vesicle microRNA biomarker discovery pipeline; from automated extracellular vesicle enrichment by acoustic trapping to microRNA sequencing
Source: PubMed Central journal article supplement (PMC6541292; doi:10.1371/journal.pone.0217507), 2019-05-29
Supplement: pone.0217507.s006.pdf [file pone.0217507.s006.pdf]

| Samples             | Bioanalyzer RNA Concentration (pg/ $\mu$ L) |
|---------------------|---------------------------------------------|
| Ultracentrifugation | 104 $\pm$ 61 (n = 3)                        |
| Acoustic trap       | 90 $\pm$ 8.7 (n = 2)                        |
| Blank               | 60 $\pm$ 30 (n=3)                           |

S1 Table
