# Supplementary material for: A urinary extracellular vesicle microRNA biomarker discovery pipeline; from automated extracellular vesicle enrichment by acoustic trapping to microRNA sequencing
Source: PubMed Central journal article supplement (PMC6541292; doi:10.1371/journal.pone.0217507), 2019-05-29
Supplement: pone.0217507.s007.pdf [file pone.0217507.s007.pdf]

| miRNAs     | Ct Values |                                  |                     |
|------------|-----------|----------------------------------|---------------------|
|            | UC        | Mean Acoustic Trapped Replicates | Cel-miR-39 spike-in |
| hsa-miR-21 | 23.0      | 30.3                             | NA                  |
| hsa-miR-24 | 25.3      | 33.2                             | NA                  |
| hsa-miR-16 | 26.1      | 33.4                             | NA                  |
| Cel-miR-39 | 29.5      | 27.8                             | 27.6                |

S2 Table
