# Supplementary material for: A urinary extracellular vesicle microRNA biomarker discovery pipeline; from automated extracellular vesicle enrichment by acoustic trapping to microRNA sequencing
Source: PubMed Central journal article supplement (PMC6541292; doi:10.1371/journal.pone.0217507), 2019-05-29
Supplement: pone.0217507.s008.pdf [file pone.0217507.s008.pdf]

| Samples | Kit      | PD Conc (pM) | Library Conc (pM) | Total Conc (pM) | % PD |
|---------|----------|--------------|-------------------|-----------------|------|
| Trap 1  | NEXTflex | 1657         | 4994              | 6651            | 25%  |
| Trap 2  | NEXTflex | 1372         | 5327              | 6700            | 20%  |
| UC      | NEXTflex | 1049         | 13272             | 14322           | 7%   |
| Trap 1  | CATS     | 1663         | 2089              | 3752            | 44%  |
| Trap 2  | CATS     | 596          | 8501              | 9098            | 7%   |
| UC      | CATS     | 572          | 43830             | 44402           | 1%   |

S3 Table
