# Supplementary material for: A urinary extracellular vesicle microRNA biomarker discovery pipeline; from automated extracellular vesicle enrichment by acoustic trapping to microRNA sequencing
Source: PubMed Central journal article supplement (PMC6541292; doi:10.1371/journal.pone.0217507), 2019-05-29
Supplement: pone.0217507.s010.pdf [file pone.0217507.s010.pdf]

| Act1 ∩ UC     | Act2 ∩ UC     | Act1 ∩ Act2   | Act1 - UC     | Act2 - UC     | UC - (Act1 ∪ Act2) |               |
|---------------|---------------|---------------|---------------|---------------|--------------------|---------------|
| let-7a-2-5p   | let-7a-2-5p   | let-7a-2-5p   | miR-10392-3p  | miR-10392-3p  | miR-369-3p         | miR-4433a-5p  |
| let-7a-5p     | let-7a-5p     | let-7a-5p     | miR-103a-2-3p | miR-1178-3p   | miR-218-1-3p       | miR-940-3p    |
| let-7b-5p     | let-7b-5p     | let-7b-5p     | miR-10400-5p  | miR-1181-3p   | miR-320d-1-3p      | miR-7-3-5p    |
| let-7c-5p     | let-7c-5p     | let-7c-5p     | miR-1260b-3p  | miR-1183-3p   | miR-320b           | miR-944-3p    |
| let-7d-3p     | let-7d-3p     | let-7d-3p     | miR-1275-5p   | miR-1202-3p   | miR-548ad-5p       | miR-1226-5p   |
| let-7d-5p     | let-7d-5p     | let-7d-5p     | miR-1281-3p   | miR-1246      | miR-548ab          | miR-4767-3p   |
| let-7e-5p     | let-7e-5p     | let-7e-5p     | miR-1304-3p   | miR-1306-5p   | miR-548k           | miR-1268a     |
| let-7f-1-5p   | let-7f-1-5p   | let-7f-1-5p   | miR-1307-5p   | miR-1307-5p   | miR-10a-3p         | miR-1268b-5p  |
| let-7f-5p     | let-7f-2-5p   | let-7f-5p     | miR-182-3p    | miR-142-5p    | miR-618-5p         | miR-1304-5p   |
| let-7g-5p     | let-7f-5p     | let-7g-5p     | miR-193a-3p   | miR-151b-5p   | miR-10527-5p       | miR-200c-5p   |
| let-7i-5p     | let-7g-5p     | let-7i-5p     | miR-1976-3p   | miR-1910-5p   | miR-330-3p         | miR-19b-2-3p  |
| miR-100-5p    | let-7i-3p     | miR-100-5p    | miR-3156-1-5p | miR-193a-3p   | miR-652-3p         | miR-9718-3p   |
| miR-101-2-3p  | let-7i-5p     | miR-101-2-3p  | miR-3187-3p   | miR-1976-5p   | miR-224-5p         | miR-374b-3p   |
| miR-101-3p    | miR-100-5p    | miR-10392-3p  | miR-3652-5p   | miR-19a-3p    | miR-148a-5p        | miR-331-5p    |
| miR-103a-1-3p | miR-101-2-3p  | miR-103a-3p   | miR-4259-3p   | miR-3180-5-3p | miR-7-1-3p         | let-7a-3p     |
| miR-103a-3p   | miR-10399-5p  | miR-10a-5p    | miR-4302-3p   | miR-33b-3p    | miR-362-3p         | miR-1284-5p   |
| miR-106b-5p   | miR-103a-3p   | miR-10b-5p    | miR-4314-3p   | miR-3621-5p   | miR-181a-2-3p      | let-7e-3p     |
| miR-10a-5p    | miR-106a-5p   | miR-12136-3p  | miR-4468-3p   | miR-378a-5p   | miR-452-5p         | miR-1468-5p   |
| miR-10b-5p    | miR-106b-3p   | miR-12136-5p  | miR-449b-5p   | miR-3945-5p   | miR-376c-3p        | miR-4750-5p   |
| miR-12136-3p  | miR-107       | miR-125a-5p   | miR-4514-5p   | miR-4283-2-5p | miR-181b-1-5p      | miR-874-3p    |
| miR-12136-5p  | miR-107-3p    | miR-125b-2-5p | miR-4516-5p   | miR-4313-3p   | miR-181b-2-5p      | miR-1269a-3p  |
| miR-1246-5p   | miR-10a-5p    | miR-125b-5p   | miR-4653-3p   | miR-4314-3p   | miR-181c-5p        | miR-1270      |
| miR-125a-5p   | miR-10b-3p    | miR-1260a-5p  | miR-4695-5p   | miR-4316-5p   | miR-4286-5p        | miR-29b-2-5p  |
| miR-125b-2-5p | miR-10b-5p    | miR-128-1-3p  | miR-4706-5p   | miR-4448-3p   | miR-487b-3p        | miR-30c-2-5p  |
| miR-125b-5p   | miR-1180-3p   | miR-128-2-3p  | miR-4734-5p   | miR-4514-5p   | miR-28-5p          | miR-6873-3p   |
| miR-1260a-5p  | miR-12136-3p  | miR-1290-3p   | miR-4778-5p   | miR-4516-5p   | miR-4636-5p        | miR-184-3p    |
| miR-1261-5p   | miR-12136-5p  | miR-1307-5p   | miR-548a-3-3p | miR-4656-5p   | miR-4636           | miR-129-1-5p  |
| miR-128-1-3p  | miR-1225-5p   | miR-135a-5p   | miR-548at-5p  | miR-486-5p    | miR-4724-5p        | miR-129-5p    |
| miR-128-2-3p  | miR-125a-3p   | miR-146b-5p   | miR-557-3p    | miR-495-3p    | miR-708-5p         | miR-12136     |
| miR-1290-3p   | miR-125a-5p   | miR-148a-3p   | miR-6130-3p   | miR-502-5p    | miR-151b-3p        | miR-7-1-5p    |
| miR-135a-5p   | miR-125b-2-5p | miR-151a-3p   | miR-636-5p    | miR-5094-3p   | miR-4781-3p        | miR-4699-5p   |
| miR-135b-5p   | miR-125b-5p   | miR-151a-5p   | miR-6506-5p   | miR-548at-5p  | miR-125b-2-3p      | miR-4647      |
| miR-140-3p    | miR-1260a-5p  | miR-152-3p    | miR-6509-5p   | miR-5739-3p   | miR-4521-5p        | miR-4284-5p   |
| miR-141-3p    | miR-1260b-5p  | miR-15b-5p    | miR-6773-5p   | miR-618       | miR-17-5p          | miR-615-3p    |
| miR-146b-5p   | miR-128-1-3p  | miR-191-5p    | miR-6779-3p   | miR-636-5p    | miR-501-5p         | miR-3620-5p   |
| miR-148a-3p   | miR-128-2-3p  | miR-192-5p    | miR-6782-5p   | miR-658-5p    | miR-656-3p         | miR-203b-3p   |
| miR-149-3p    | miR-128-3p    | miR-193a-3p   | miR-6805-3p   | miR-663b-3p   | miR-34c-3p         | miR-146b-3p   |
| miR-151a-3p   | miR-1290-3p   | miR-193b-5p   | miR-6819-5p   | miR-6737-5p   | miR-92b-3p         | miR-370-3p    |
| miR-151a-5p   | miR-135a-2-3p | miR-194-1-5p  | miR-6865-5p   | miR-6756-3p   | miR-4709-5p        | miR-1285-1-5p |
| miR-152-3p    | miR-135a-5p   | miR-194-2-5p  | miR-6870-5p   | miR-6773-5p   | miR-199b-3p        | miR-301a-5p   |
| miR-15b-5p    | miR-146b-5p   | miR-194-5p    | miR-6894-5p   | miR-6786-5p   | miR-148b-3p        | miR-3663-3p   |
| miR-181b-5p   | miR-148a-3p   | miR-200a-3p   | miR-7114-3p   | miR-6805-3p   | miR-625-3p         | let-7a-3-5p   |
| miR-181d-5p   | miR-151a-3p   | miR-200b-3p   | miR-7161-3p   | miR-7161-3p   | miR-421-3p         | miR-6821-5p   |
| miR-186-5p    | miR-151a-5p   | miR-200c-3p   | miR-8057-5p   | miR-8087-3p   | miR-16-2-3p        | miR-138-1-3p  |
| miR-191-5p    | miR-152-3p    | miR-203a-3p   | miR-8063-3p   |               | miR-181a-3p        | miR-345-5p    |
| miR-192-5p    | miR-15b-5p    | miR-204-3p    | miR-9902-1-5p |               | miR-454-5p         | miR-29b-1-5p  |
| miR-193b-5p   | miR-16-1-5p   | miR-204-5p    |               |               | miR-4324-3p        | miR-3182-5p   |
| miR-194-1-5p  | miR-16-5p     | miR-21-5p     |               |               | miR-6827-3p        | miR-136-5p    |
| miR-194-2-5p  | miR-181a-2-5p | miR-22-3p     |               |               | miR-125b-1-3p      | miR-505-5p    |
| miR-194-5p    | miR-181a-5p   | miR-221-3p    |               |               | miR-1306-3p        | miR-718-5p    |
| miR-196a-1-5p | miR-182-5p    | miR-222-3p    |               |               | let-7b-3p          | miR-6855-5p   |
| miR-196a-2-5p | miR-183-5p    | miR-23a-3p    |               |               | miR-1229-3p        | miR-23a-5p    |
| miR-196b-5p   | miR-185-5p    | miR-23b-3p    |               |               | miR-130b-5p        | miR-92a-2-5p  |
| miR-200a-3p   | miR-191-5p    | miR-23c-3p    |               |               | miR-664-5p         | miR-23b-5p    |
| miR-200b-3p   | miR-192-5p    | miR-24-1-3p   |               |               | miR-1307-3p        | miR-1268a-5p  |
| miR-200c-3p   | miR-193b-5p   | miR-24-3p     |               |               | miR-10399-3p       | miR-24-1-5p   |

|               |               |               |  |  |               |               |
|---------------|---------------|---------------|--|--|---------------|---------------|
| miR-203a-3p   | miR-194-1-5p  | miR-26a-2-5p  |  |  | miR-2110-3p   | miR-6790-3p   |
| miR-204-3p    | miR-194-2-5p  | miR-26a-5p    |  |  | miR-378c-5p   | miR-3613-5p   |
| miR-204-5p    | miR-194-5p    | miR-26b-5p    |  |  | miR-378f-3p   | miR-506-3p    |
| miR-205-5p    | miR-196a-5p   | miR-27a-3p    |  |  | miR-1270-5p   | miR-877-5p    |
| miR-20a-5p    | miR-199a-2-3p | miR-27b-3p    |  |  | miR-653-3p    | miR-132-3p    |
| miR-21-5p     | miR-200a-3p   | miR-28-3p     |  |  | miR-5588-5p   | miR-1236-5p   |
| miR-218-5p    | miR-200b-3p   | miR-29a-3p    |  |  | miR-149-5p    | miR-4758-5p   |
| miR-22-3p     | miR-200b-5p   | miR-30a-3p    |  |  | miR-146a-5p   | miR-1343-5p   |
| miR-221-3p    | miR-200c-3p   | miR-30a-5p    |  |  | miR-6745-3p   | miR-3074-5p   |
| miR-222-3p    | miR-203a-3p   | miR-30b-5p    |  |  | miR-504-5p    | miR-582-3p    |
| miR-23a-3p    | miR-204-3p    | miR-30c-1-5p  |  |  | miR-6131-3p   | miR-124-1-3p  |
| miR-23b-3p    | miR-204-5p    | miR-30c-5p    |  |  | miR-27b-5p    | miR-193a-5p   |
| miR-23c-3p    | miR-206       | miR-30d-5p    |  |  | miR-485-5p    | miR-18a-3p    |
| miR-24-1-3p   | miR-21-5p     | miR-30e-3p    |  |  | miR-605-3p    | miR-500b-5p   |
| miR-24-2-5p   | miR-2110-5p   | miR-30e-5p    |  |  | miR-574-5p    | miR-500a-5p   |
| miR-24-3p     | miR-215-5p    | miR-3178-5p   |  |  | miR-508-3p    | miR-216a-5p   |
| miR-26a-2-5p  | miR-22-3p     | miR-320a-3p   |  |  | miR-891a-5p   | miR-365b-3p   |
| miR-26a-5p    | miR-221-3p    | miR-320b-1-3p |  |  | miR-29b-1-3p  | miR-590-3p    |
| miR-26b-5p    | miR-221-5p    | miR-320b-2-3p |  |  | miR-424-5p    | miR-514a-1-5p |
| miR-27a-3p    | miR-222-3p    | miR-320e-3p   |  |  | miR-210-5p    | miR-4802-3p   |
| miR-27a-5p    | miR-23a-3p    | miR-335-3p    |  |  | miR-3173-5p   | miR-598-3p    |
| miR-27b-3p    | miR-23b-3p    | miR-335-5p    |  |  | miR-92b-5p    | miR-888-5p    |
| miR-28-3p     | miR-23c-3p    | miR-34b-3p    |  |  | miR-34a-5p    | miR-508-5p    |
| miR-29a-3p    | miR-24-1-3p   | miR-363-3p    |  |  | miR-6876-5p   | miR-509-2-5p  |
| miR-29c-3p    | miR-24-3p     | miR-3648-2-5p |  |  | miR-1255a-5p  | miR-195-5p    |
| miR-30a-3p    | miR-25-3p     | miR-374b-5p   |  |  | miR-30c-1-3p  | miR-15a-5p    |
| miR-30a-5p    | miR-25-5p     | miR-375-3p    |  |  | miR-647-3p    | miR-16-2-5p   |
| miR-30b-5p    | miR-26a-2-3p  | miR-379-5p    |  |  | miR-342-5p    | miR-34c-5p    |
| miR-30c-1-5p  | miR-26a-2-5p  | miR-423-3p    |  |  | miR-629-5p    | miR-493-5p    |
| miR-30c-2-3p  | miR-26a-5p    | miR-423-5p    |  |  | miR-4538-3p   | miR-5004-5p   |
| miR-30c-5p    | miR-26b-5p    | miR-429       |  |  | miR-92a-1-5p  | miR-1843-5p   |
| miR-30d-5p    | miR-27a-3p    | miR-4314-3p   |  |  | miR-22-5p     | miR-135a-2-5p |
| miR-30e-3p    | miR-27b-3p    | miR-4443-5p   |  |  | miR-542-3p    | miR-664a-3p   |
| miR-30e-5p    | miR-28-3p     | miR-4488-5p   |  |  | miR-500b-3p   | miR-92a-2-3p  |
| miR-3178-5p   | miR-29a-3p    | miR-4508-5p   |  |  | miR-934-3p    | miR-3065-5p   |
| miR-320a-3p   | miR-30a-3p    | miR-4514-5p   |  |  | miR-26a-1-5p  | miR-12125-3p  |
| miR-320b-1-3p | miR-30a-5p    | miR-4516-5p   |  |  | miR-340-5p    | miR-3664-3p   |
| miR-320b-2-3p | miR-30b-5p    | miR-501-3p    |  |  | miR-9-3p      | miR-340-3p    |
| miR-320e-3p   | miR-30c-1-5p  | miR-532-5p    |  |  | miR-499a-5p   | miR-338-3p    |
| miR-335-3p    | miR-30c-5p    | miR-548at-5p  |  |  | miR-155-5p    | miR-125b-1-5p |
| miR-335-5p    | miR-30d-5p    | miR-628-3p    |  |  | miR-4662a-5p  | miR-671-3p    |
| miR-342-3p    | miR-30e-3p    | miR-636-5p    |  |  | miR-421       | miR-1237-3p   |
| miR-34b-3p    | miR-30e-5p    | miR-6773-5p   |  |  | miR-95-3p     | miR-151b      |
| miR-362-5p    | miR-31-5p     | miR-6805-3p   |  |  | miR-513a-2-5p | miR-6771-5p   |
| miR-363-3p    | miR-3178-5p   | miR-6816-5p   |  |  | miR-197-3p    | miR-187-3p    |
| miR-3648-2-5p | miR-320a-3p   | miR-7161-3p   |  |  | miR-200a-5p   | miR-6787-3p   |
| miR-365a-3p   | miR-320b-1-3p | miR-760-5p    |  |  | miR-556-5p    | miR-1843-3p   |
| miR-374a-5p   | miR-320b-2-3p | miR-7703-5p   |  |  | let-7a-1-5p   | miR-4742-3p   |
| miR-374b-5p   | miR-320c-1-3p | miR-9-1-5p    |  |  | miR-1301-3p   | miR-942-5p    |
| miR-375-3p    | miR-320e-3p   | miR-92a-1-3p  |  |  | miR-455-3p    | miR-589-5p    |
| miR-379-5p    | miR-335-3p    | miR-92a-3p    |  |  | miR-6872-3p   | miR-769-5p    |
| miR-423-3p    | miR-335-5p    | miR-98-5p     |  |  | miR-628-5p    | miR-4510-5p   |
| miR-423-5p    | miR-338-5p    | miR-99a-5p    |  |  | miR-30b-3p    | miR-6875-5p   |
| miR-424-3p    | miR-339-3p    | miR-99b-3p    |  |  | miR-6843-3p   | miR-6734-5p   |
| miR-425-3p    | miR-34b-3p    | miR-99b-5p    |  |  | miR-374a-3p   | miR-190a-5p   |
| miR-429       | miR-361-3p    |               |  |  | miR-576-5p    | miR-509-3p    |
| miR-429-3p    | miR-361-5p    |               |  |  | miR-514a-3p   | miR-891b-5p   |
| miR-4429-5p   | miR-3615-3p   |               |  |  | miR-450a-1-3p | miR-744-5p    |
| miR-4443-5p   | miR-363-3p    |               |  |  | miR-450a-2-3p | miR-7-5p      |
| miR-4455-5p   | miR-3648-2-5p |               |  |  | miR-509-2-3p  | miR-1-3p      |

|              |              |  |  |  |                |               |
|--------------|--------------|--|--|--|----------------|---------------|
| miR-4485-3p  | miR-365a-5p  |  |  |  | miR-450b-5p    | miR-206-3p    |
| miR-4488-5p  | miR-374b-5p  |  |  |  | miR-450a-1-5p  | miR-184       |
| miR-4508-5p  | miR-375-3p   |  |  |  | miR-548am-5p   | miR-6515-5p   |
| miR-484      | miR-378a-3p  |  |  |  | miR-20b-5p     | miR-1291-3p   |
| miR-484-5p   | miR-378i-5p  |  |  |  | miR-21-3p      | miR-6721-5p   |
| miR-489-3p   | miR-379-5p   |  |  |  | miR-708-3p     | miR-6508-3p   |
| miR-500a-3p  | miR-382-5p   |  |  |  | miR-194-2-3p   | miR-664b-5p   |
| miR-501-3p   | miR-3960-3p  |  |  |  | let-7a-3-3p    | miR-4450      |
| miR-502-3p   | miR-423-3p   |  |  |  | miR-32-3p      | miR-4536-2-5p |
| miR-503-5p   | miR-423-5p   |  |  |  | miR-6750-3p    | miR-412-5p    |
| miR-5100-3p  | miR-425-5p   |  |  |  | miR-4485-5p    | miR-223-3p    |
| miR-532-5p   | miR-429      |  |  |  | miR-1233-2-5p  | miR-934       |
| miR-6126-5p  | miR-4443-5p  |  |  |  | miR-3144-5p    | miR-934-5p    |
| miR-628-3p   | miR-4454-5p  |  |  |  | miR-892a-3p    | miR-4796-5p   |
| miR-641-5p   | miR-4488-5p  |  |  |  | miR-3934-5p    | miR-4504      |
| miR-653-5p   | miR-4508-5p  |  |  |  | miR-3065-3p    | miR-19b-3p    |
| miR-6816-5p  | miR-451a     |  |  |  | miR-328-3p     | miR-582-5p    |
| miR-760-5p   | miR-454-3p   |  |  |  | miR-218-2-5p   | miR-6866-5p   |
| miR-7703-5p  | miR-501-3p   |  |  |  | miR-130a-3p    | miR-4662b-5p  |
| miR-9-1-5p   | miR-505-3p   |  |  |  | miR-676-3p     | miR-1295a-3p  |
| miR-9-5p     | miR-532-3p   |  |  |  | miR-130b-3p    | miR-1296-5p   |
| miR-92a-1-3p | miR-532-5p   |  |  |  | miR-140-5p     | miR-584-5p    |
| miR-92a-3p   | miR-574-3p   |  |  |  | miR-4800-3p    | miR-513b-5p   |
| miR-93-5p    | miR-628-3p   |  |  |  | miR-30d-3p     | miR-6883-3p   |
| miR-98-5p    | miR-660-5p   |  |  |  | miR-195-3p     | miR-3124-5p   |
| miR-99a-5p   | miR-664-3p   |  |  |  | miR-194-3p     | miR-514a-1-3p |
| miR-99b-3p   | miR-6803-3p  |  |  |  | miR-6747-3p    | miR-4443      |
| miR-99b-5p   | miR-6816-5p  |  |  |  | miR-181a-1-3p  | miR-6740-5p   |
|              | miR-760-5p   |  |  |  | miR-323b-3p    | miR-2110      |
|              | miR-7703-5p  |  |  |  | miR-199b-5p    | miR-1303-3p   |
|              | miR-7975-3p  |  |  |  | miR-8078-5p    | miR-1303      |
|              | miR-7977-5p  |  |  |  | miR-339-5p     | miR-651-5p    |
|              | miR-9-1-3p   |  |  |  | miR-126-3p     | miR-122b-5p   |
|              | miR-9-1-5p   |  |  |  | miR-6511b-1-3p | miR-96-5p     |
|              | miR-92a-1-3p |  |  |  | miR-3605-3p    | miR-450a-5p   |
|              | miR-92a-3p   |  |  |  | miR-26b-3p     |               |
|              | miR-98-5p    |  |  |  | miR-15b-3p     |               |
|              | miR-99a-5p   |  |  |  | miR-409-3p     |               |
|              | miR-99b-3p   |  |  |  | miR-3605-5p    |               |
|              | miR-99b-5p   |  |  |  | miR-1234-5p    |               |

S5 Table
