# Supplementary material for: A urinary extracellular vesicle microRNA biomarker discovery pipeline; from automated extracellular vesicle enrichment by acoustic trapping to microRNA sequencing
Source: PubMed Central journal article supplement (PMC6541292; doi:10.1371/journal.pone.0217507), 2019-05-29
Supplement: pone.0217507.s011.pdf [file pone.0217507.s011.pdf]

| miR           | UC     | Act replicate 1 | Act replicate 2 | miR           | UC   | Act replicate 1 | Act replicate 2 | miR           | UC   | Act replicate 1 | Act replicate 2 | miR           | UC   | Act replicate 1 | Act replicate 2 |
|---------------|--------|-----------------|-----------------|---------------|------|-----------------|-----------------|---------------|------|-----------------|-----------------|---------------|------|-----------------|-----------------|
| miR-30a-5p    | 674176 | 1021            | 412             | miR-26b-5p    | 6966 | 42              | 71              | miR-15b-5p    | 1085 | 3               | 3               | miR-15b-5p    | 1085 | 3               | 1               |
| let-7a-5p     | 466628 | 900             | 855             | miR-103a-3p   | 6768 | 1               | 15              | miR-141-3p    | 1084 | 5               | 5               | miR-141-3p    | 1084 | 5               | 0               |
| miR-10b-5p    | 445134 | 1273            | 1278            | miR-423-3p    | 6008 | 36              | 15              | miR-10a-3p    | 1015 | 0               | 0               | miR-10a-3p    | 1015 | 0               | 0               |
| let-7b-5p     | 368595 | 1397            | 1817            | miR-22-3p     | 5760 | 20              | 20              | miR-502-3p    | 1012 | 8               | 0               | miR-502-3p    | 1012 | 8               | 0               |
| miR-10a-5p    | 297936 | 633             | 569             | miR-28-3p     | 5516 | 16              | 3               | miR-135a-2-3p | 1010 | 0               | 0               | miR-135a-2-3p | 1010 | 0               | 6               |
| let-7a-2-5p   | 246977 | 525             | 529             | miR-320b-1-3p | 5469 | 10              | 30              | miR-151b-3p   | 986  | 0               | 0               | miR-151b-3p   | 986  | 0               | 0               |
| let-7f-5p     | 246240 | 327             | 292             | miR-23c-3p    | 5333 | 2               | 23              | miR-196a-2-5p | 981  | 13              | 13              | miR-196a-2-5p | 981  | 13              | 0               |
| miR-26a-5p    | 175650 | 332             | 415             | miR-30b-5p    | 5316 | 22              | 14              | miR-103a-1-3p | 981  | 16              | 16              | miR-103a-1-3p | 981  | 16              | 0               |
| miR-30d-5p    | 168972 | 551             | 531             | miR-1260a-5p  | 5227 | 25              | 88              | miR-196a-1-5p | 975  | 8               | 8               | miR-196a-1-5p | 975  | 8               | 0               |
| let-7e-5p     | 108606 | 166             | 115             | miR-29a-3p    | 5118 | 41              | 3               | miR-125b-2-3p | 969  | 0               | 0               | miR-125b-2-3p | 969  | 0               | 0               |
| miR-30c-1-5p  | 98888  | 334             | 494             | miR-186-5p    | 4762 | 6               | 0               | miR-148b-3p   | 953  | 0               | 0               | miR-148b-3p   | 953  | 0               | 0               |
| miR-21-5p     | 98600  | 464             | 281             | miR-146b-5p   | 4707 | 15              | 34              | miR-181a-5p   | 939  | 0               | 0               | miR-181a-5p   | 939  | 0               | 1               |
| let-7c-5p     | 93231  | 218             | 332             | miR-95-3p     | 4491 | 0               | 0               | miR-505-3p    | 915  | 0               | 0               | miR-505-3p    | 915  | 0               | 20              |
| let-7f-1-5p   | 81646  | 132             | 120             | miR-9-1-5p    | 4327 | 7               | 4               | miR-135a-5p   | 911  | 14              | 14              | miR-135a-5p   | 911  | 14              | 23              |
| miR-375-3p    | 80072  | 198             | 133             | miR-183-5p    | 4234 | 0               | 2               | miR-361-3p    | 896  | 0               | 0               | miR-361-3p    | 896  | 0               | 1               |
| miR-125a-5p   | 59986  | 262             | 303             | miR-151a-3p   | 4159 | 28              | 24              | let-7a-1-5p   | 863  | 0               | 0               | let-7a-1-5p   | 863  | 0               | 0               |
| miR-200c-3p   | 41801  | 108             | 47              | miR-335-5p    | 4089 | 1               | 6               | miR-205-5p    | 863  | 7               | 7               | miR-205-5p    | 863  | 7               | 0               |
| let-7e-5p     | 32442  | 81              | 75              | miR-760-5p    | 3914 | 262             | 93              | miR-361-5p    | 859  | 0               | 0               | miR-361-5p    | 859  | 0               | 11              |
| miR-99b-5p    | 31185  | 71              | 39              | miR-30c-2-3p  | 3516 | 11              | 0               | miR-92b-3p    | 859  | 0               | 0               | miR-92b-3p    | 859  | 0               | 0               |
| miR-92a-3p    | 31079  | 117             | 100             | miR-93-5p     | 3363 | 26              | 0               | miR-29c-3p    | 812  | 5               | 5               | miR-29c-3p    | 812  | 5               | 0               |
| miR-200b-3p   | 27125  | 73              | 57              | miR-30e-3p    | 3248 | 9               | 23              | miR-500a-3p   | 803  | 7               | 7               | miR-500a-3p   | 803  | 7               | 0               |
| miR-99a-5p    | 25634  | 35              | 56              | miR-429       | 3108 | 16              | 2               | miR-12136-5p  | 766  | 26              | 26              | miR-12136-5p  | 766  | 26              | 15              |
| miR-30a-3p    | 25047  | 86              | 84              | miR-363-3p    | 3097 | 12              | 1               | miR-16-1-5p   | 731  | 0               | 0               | miR-16-1-5p   | 731  | 0               | 6               |
| miR-27b-3p    | 24959  | 136             | 133             | miR-92a-1-3p  | 2981 | 28              | 8               | miR-31-5p     | 704  | 0               | 0               | miR-31-5p     | 704  | 0               | 5               |
| miR-423-5p    | 24338  | 45              | 53              | miR-200b-5p   | 2928 | 0               | 3               | miR-149-5p    | 693  | 0               | 0               | miR-149-5p    | 693  | 0               | 0               |
| miR-191-5p    | 22915  | 14              | 65              | miR-24-3p     | 2845 | 18              | 10              | miR-128-1-3p  | 628  | 11              | 11              | miR-128-1-3p  | 628  | 11              | 6               |
| miR-204-5p    | 22536  | 167             | 253             | miR-128-3p    | 2818 | 0               | 1               | miR-450b-5p   | 597  | 0               | 0               | miR-450b-5p   | 597  | 0               | 0               |
| miR-30e-5p    | 22014  | 613             | 644             | miR-194-5p    | 2798 | 48              | 40              | miR-135b-5p   | 577  | 3               | 3               | miR-135b-5p   | 577  | 3               | 0               |
| miR-98-5p     | 18637  | 97              | 60              | miR-28-5p     | 2708 | 0               | 0               | miR-130b-5p   | 576  | 0               | 0               | miR-130b-5p   | 576  | 0               | 0               |
| miR-148a-3p   | 16885  | 88              | 79              | miR-501-3p    | 2507 | 2               | 3               | miR-10b-3p    | 572  | 0               | 0               | miR-10b-3p    | 572  | 0               | 12              |
| let-7d-5p     | 16421  | 34              | 31              | miR-222-3p    | 2505 | 22              | 26              | miR-200a-5p   | 558  | 0               | 0               | miR-200a-5p   | 558  | 0               | 0               |
| miR-151a-5p   | 16330  | 71              | 38              | miR-25-3p     | 2215 | 0               | 6               | miR-29b-1-3p  | 557  | 0               | 0               | miR-29b-1-3p  | 557  | 0               | 0               |
| miR-26a-2-5p  | 16038  | 87              | 47              | miR-532-5p    | 2165 | 16              | 9               | miR-7-5p      | 553  | 0               | 0               | miR-7-5p      | 553  | 0               | 0               |
| miR-200a-3p   | 14414  | 12              | 10              | miR-140-3p    | 2056 | 2               | 0               | miR-660-5p    | 553  | 0               | 0               | miR-660-5p    | 553  | 0               | 12              |
| let-7f-5p     | 14086  | 9               | 7               | miR-27a-3p    | 2028 | 4               | 2               | miR-374b-5p   | 547  | 13              | 13              | miR-374b-5p   | 547  | 13              | 19              |
| miR-30c-5p    | 12434  | 49              | 96              | miR-16-5p     | 1670 | 0               | 14              | miR-193a-5p   | 544  | 0               | 0               | miR-193a-5p   | 544  | 0               | 0               |
| miR-23b-3p    | 11901  | 14              | 39              | miR-24-1-3p   | 1653 | 15              | 2               | miR-484-5p    | 528  | 4               | 4               | miR-484-5p    | 528  | 4               | 0               |
| miR-23a-3p    | 11659  | 74              | 51              | miR-378a-3p   | 1613 | 0               | 1               | miR-181a-2-3p | 521  | 0               | 0               | miR-181a-2-3p | 521  | 0               | 0               |
| miR-320a-3p   | 11385  | 51              | 16              | miR-574-3p    | 1535 | 0               | 3               | miR-146a-5p   | 496  | 0               | 0               | miR-146a-5p   | 496  | 0               | 0               |
| miR-125b-5p   | 10383  | 32              | 19              | miR-340-5p    | 1482 | 0               | 0               | miR-374a-5p   | 490  | 5               | 5               | miR-374a-5p   | 490  | 5               | 0               |
| miR-100-5p    | 10378  | 125             | 96              | miR-181a-2-5p | 1454 | 0               | 24              | miR-9-1-3p    | 489  | 0               | 0               | miR-9-1-3p    | 489  | 0               | 4               |
| miR-101-2-3p  | 9416   | 46              | 18              | miR-196a-5p   | 1420 | 0               | 14              | miR-7-3-5p    | 474  | 0               | 0               | miR-7-3-5p    | 474  | 0               | 0               |
| miR-125b-2-5p | 8979   | 27              | 76              | miR-425-5p    | 1409 | 0               | 1               | miR-1180-3p   | 468  | 0               | 0               | miR-1180-3p   | 468  | 0               | 5               |
| let-7d-3p     | 8928   | 47              | 79              | miR-424-3p    | 1373 | 2               | 0               | miR-542-3p    | 456  | 0               | 0               | miR-542-3p    | 456  | 0               | 0               |
| let-7f-2-5p   | 8508   | 0               | 28              | miR-342-3p    | 1198 | 9               | 0               | miR-196b-5p   | 453  | 9               | 9               | miR-196b-5p   | 453  | 9               | 0               |
| miR-192-5p    | 8469   | 46              | 77              | miR-224-5p    | 1193 | 0               | 0               | miR-340-3p    | 438  | 0               | 0               | miR-340-3p    | 438  | 0               | 0               |
| miR-182-5p    | 8287   | 0               | 15              | miR-429-3p    | 1192 | 4               | 0               | miR-320c-1-3p | 429  | 0               | 0               | miR-320c-1-3p | 429  | 0               | 9               |
| miR-203a-3p   | 7789   | 168             | 40              | miR-221-3p    | 1140 | 8               | 23              | miR-7977-5p   | 429  | 0               | 0               | miR-7977-5p   | 429  | 0               | 18              |
| miR-194-2-5p  | 7384   | 57              | 48              | miR-194-1-5p  | 1096 | 26              | 24              | miR-197-3p    | 421  | 0               | 0               | miR-197-3p    | 421  | 0               | 0               |





| miR           | UC | Act replicate 1 | Act replicate 2 | miR           | UC | Act replicate 1 | Act replicate 2 | miR           | UC | Act replicate 1 | Act replicate 2 | miR | UC | Act replicate 1 | Act replicate 2 |
|---------------|----|-----------------|-----------------|---------------|----|-----------------|-----------------|---------------|----|-----------------|-----------------|-----|----|-----------------|-----------------|
| miR-130b-3p   | 1  | 0               | 0               | miR-3605-5p   | 28 | 0               | 0               | miR-7114-3p   | 0  | 5               | 0               |     |    |                 |                 |
| miR-4510-5p   | 1  | 0               | 0               | miR-1284-5p   | 28 | 0               | 0               | miR-4734-5p   | 0  | 2               | 0               |     |    |                 |                 |
| miR-10399-5p  | 1  | 0               | 1               | miR-122b-5p   | 28 | 0               | 0               | miR-1281-3p   | 0  | 1               | 0               |     |    |                 |                 |
| miR-6771-5p   | 1  | 0               | 0               | miR-3204-1-3p | 27 | 0               | 0               | miR-1976-3p   | 0  | 4               | 0               |     |    |                 |                 |
| miR-6747-3p   | 1  | 0               | 0               | miR-548k      | 27 | 0               | 0               | miR-4695-5p   | 0  | 3               | 0               |     |    |                 |                 |
| miR-8078-5p   | 1  | 0               | 0               | miR-25-5p     | 27 | 0               | 1               | miR-486-5p    | 0  | 0               | 0               |     |    |                 |                 |
| miR-940-3p    | 1  | 0               | 0               | miR-4485-5p   | 27 | 0               | 0               | miR-5739-3p   | 0  | 0               | 0               |     |    |                 |                 |
| miR-4767-3p   | 1  | 0               | 0               | miR-6803-3p   | 27 | 0               | 10              | miR-1183-3p   | 0  | 0               | 3               |     |    |                 |                 |
| miR-3648-2-5p | 1  | 4               | 21              | let-7e-3p     | 27 | 0               | 0               | miR-1181-3p   | 0  | 0               | 4               |     |    |                 |                 |
| miR-9718-3p   | 1  | 0               | 0               | miR-1269a-3p  | 27 | 0               | 0               | miR-19a-3p    | 0  | 0               | 1               |     |    |                 |                 |
| miR-129-1-5p  | 1  | 0               | 0               | miR-181c-5p   | 26 | 0               | 0               | miR-1307-5p   | 0  | 1               | 1               |     |    |                 |                 |
| miR-345-5p    | 1  | 0               | 0               | miR-500a-5p   | 26 | 0               | 0               | miR-10392-3p  | 0  | 18              | 10              |     |    |                 |                 |
| miR-7703-5p   | 1  | 1               | 16              | miR-4781-3p   | 26 | 0               | 0               | miR-4706-5p   | 0  | 20              | 0               |     |    |                 |                 |
| miR-6855-5p   | 1  | 0               | 0               | miR-6873-3p   | 26 | 0               | 0               | miR-1260b-3p  | 0  | 9               | 0               |     |    |                 |                 |
| miR-1268a-5p  | 1  | 0               | 0               | miR-129-5p    | 26 | 0               | 0               | miR-4468-3p   | 0  | 1               | 0               |     |    |                 |                 |
| let-7i-3p     | 1  | 0               | 1               | miR-24-2-5p   | 26 | 5               | 0               | miR-6782-5p   | 0  | 6               | 0               |     |    |                 |                 |
| miR-1225-5p   | 1  | 0               | 1               | miR-934-5p    | 26 | 0               | 0               | miR-4516-5p   | 0  | 18              | 11              |     |    |                 |                 |
| miR-557-3p    | 0  | 6               | 0               | miR-708-5p    | 25 | 0               | 0               | miR-6773-5p   | 0  | 20              | 10              |     |    |                 |                 |
| miR-618       | 0  | 0               | 4               | miR-124-1-3p  | 25 | 0               | 0               | miR-6865-5p   | 0  | 8               | 0               |     |    |                 |                 |
| miR-495-3p    | 0  | 0               | 12              | miR-3960-3p   | 25 | 0               | 16              | miR-8057-5p   | 0  | 12              | 0               |     |    |                 |                 |
| miR-8087-3p   | 0  | 0               | 12              | miR-4504      | 25 | 0               | 0               | miR-10400-5p  | 0  | 4               | 0               |     |    |                 |                 |
| miR-1246      | 0  | 0               | 15              | miR-1255a-5p  | 24 | 0               | 0               | miR-4259-3p   | 0  | 12              | 0               |     |    |                 |                 |
| miR-4313-3p   | 0  | 0               | 9               | miR-1268b-5p  | 24 | 0               | 0               | miR-3187-3p   | 0  | 12              | 0               |     |    |                 |                 |
| miR-1976-5p   | 0  | 0               | 7               | miR-4724-5p   | 23 | 0               | 0               | miR-6819-5p   | 0  | 7               | 0               |     |    |                 |                 |
| miR-5094-3p   | 0  | 0               | 12              | miR-6875-5p   | 23 | 0               | 0               | miR-3652-5p   | 0  | 7               | 0               |     |    |                 |                 |
| miR-4283-2-5p | 0  | 0               | 8               | miR-605-3p    | 23 | 0               | 0               | miR-6509-5p   | 0  | 10              | 0               |     |    |                 |                 |
| miR-3180-5-3p | 0  | 0               | 15              | miR-4485-3p   | 22 | 15              | 0               | miR-502-5p    | 0  | 0               | 16              |     |    |                 |                 |
| miR-1306-5p   | 0  | 0               | 1               | miR-34c-5p    | 22 | 0               | 0               | miR-1202-3p   | 0  | 0               | 1               |     |    |                 |                 |
| miR-1910-5p   | 0  | 0               | 1               | miR-548am-5p  | 22 | 0               | 0               | miR-4316-5p   | 0  | 0               | 1               |     |    |                 |                 |
| miR-142-5p    | 0  | 0               | 10              | miR-206       | 22 | 0               | 9               | miR-6737-5p   | 0  | 0               | 8               |     |    |                 |                 |
| miR-3621-5p   | 0  | 0               | 7               | miR-944-3p    | 22 | 0               | 0               | miR-4448-3p   | 0  | 0               | 17              |     |    |                 |                 |
| miR-33b-3p    | 0  | 0               | 3               | miR-10399-3p  | 21 | 0               | 0               | miR-9902-1-5p | 0  | 11              | 0               |     |    |                 |                 |
| miR-6786-5p   | 0  | 0               | 1               | miR-200c-5p   | 21 | 0               | 0               | miR-1275-5p   | 0  | 14              | 0               |     |    |                 |                 |
| miR-151b-5p   | 0  | 0               | 4               | miR-29b-2-5p  | 21 | 0               | 0               | miR-1304-3p   | 0  | 4               | 0               |     |    |                 |                 |
| miR-658-5p    | 0  | 0               | 1               | miR-23a-5p    | 21 | 0               | 0               | miR-193a-3p   | 0  | 8               | 3               |     |    |                 |                 |
| miR-1178-3p   | 0  | 0               | 13              | miR-125b-1-3p | 20 | 0               | 0               | miR-4778-5p   | 0  | 1               | 0               |     |    |                 |                 |
| miR-378a-5p   | 0  | 0               | 1               | miR-125b-1-5p | 20 | 0               | 0               | miR-3156-1-5p | 0  | 8               | 0               |     |    |                 |                 |
| miR-4656-5p   | 0  | 0               | 9               | miR-651-5p    | 20 | 0               | 0               | miR-6894-5p   | 0  | 4               | 0               |     |    |                 |                 |
| miR-4302-3p   | 0  | 1               | 0               | miR-7-1-3p    | 19 | 0               | 0               | miR-548at-5p  | 0  | 7               | 43              |     |    |                 |                 |
| miR-103a-2-3p | 0  | 6               | 0               | miR-576-5p    | 19 | 0               | 0               | miR-6506-5p   | 0  | 6               | 0               |     |    |                 |                 |
| miR-4514-5p   | 0  | 34              | 14              | miR-3144-5p   | 19 | 0               | 0               | miR-449b-5p   | 0  | 6               | 0               |     |    |                 |                 |
| miR-8063-3p   | 0  | 7               | 0               | miR-206-3p    | 19 | 0               | 0               | miR-4314-3p   | 0  | 23              | 14              |     |    |                 |                 |
| miR-7161-3p   | 0  | 7               | 30              | miR-4450      | 19 | 0               | 0               | miR-636-5p    | 0  | 1               | 1               |     |    |                 |                 |
| miR-4653-3p   | 0  | 2               | 0               | miR-506-3p    | 19 | 0               | 0               | miR-6779-3p   | 0  | 1               | 0               |     |    |                 |                 |
| miR-6130-3p   | 0  | 1               | 0               | miR-6740-5p   | 19 | 0               | 0               | miR-6756-3p   | 0  | 0               | 1               |     |    |                 |                 |
| miR-6870-5p   | 0  | 8               | 0               | miR-450a-1-3p | 17 | 0               | 0               | miR-3945-5p   | 0  | 0               | 7               |     |    |                 |                 |
| miR-182-3p    | 0  | 20              | 0               | miR-378i-5p   | 17 | 0               | 1               | miR-663b-3p   | 0  | 0               | 1               |     |    |                 |                 |
| miR-6805-3p   | 0  | 48              | 5               | miR-24-1-5p   | 17 | 0               | 0               |               |    |                 |                 |     |    |                 |                 |
| miR-548a-3-3p | 0  | 6               | 0               | miR-92a-2-3p  | 16 | 0               | 0               |               |    |                 |                 |     |    |                 |                 |

S6 Table
