# Supplementary material for: A urinary extracellular vesicle microRNA biomarker discovery pipeline; from automated extracellular vesicle enrichment by acoustic trapping to microRNA sequencing
Source: PubMed Central journal article supplement (PMC6541292; doi:10.1371/journal.pone.0217507), 2019-05-29
Supplement: pone.0217507.s012.pdf [file pone.0217507.s012.pdf]

| miRNA             | C1       | C2       | C3       | C10      | C5       | C6       | C7      | C8       | C9       |
|-------------------|----------|----------|----------|----------|----------|----------|---------|----------|----------|
| hsa-let-7a-5p     | 43445.1  | 61968.5  | 30341.9  | 33693.9  | 21264.6  | 33524.5  | 22415.5 | 33367.6  | 18207.3  |
| hsa-let-7a-5p     | 43525.4  | 62056.7  | 30400.8  | 33767.3  | 21303.2  | 33595.4  | 22512   | 33404.9  | 18223.9  |
| hsa-let-7a-5p     | 44214.9  | 63094.2  | 31042.2  | 34961.8  | 22027.7  | 34515.1  | 23073.8 | 34704.5  | 18742.8  |
| hsa-let-7b-5p     | 104060.1 | 147858.8 | 73869.9  | 47914.8  | 45375.9  | 78744    | 61529.4 | 67738.4  | 49346.1  |
| hsa-let-7c-5p     | 23893.7  | 32887.8  | 12243.5  | 9790     | 9597.1   | 17335.7  | 12424.8 | 19888.1  | 8955.1   |
| hsa-let-7d-3p     | 247.3    | 317.3    | 238.4    | 286      | 192.9    | 415.5    | 303.2   | 259.6    | 197.4    |
| hsa-let-7d-5p     | 1815.5   | 2363.5   | 1274.5   | 1186.2   | 865.4    | 1683.3   | 819.3   | 1279     | 888.3    |
| hsa-let-7e-5p     | 3963.7   | 5281     | 3630.9   | 1877.2   | 2101.9   | 4563.9   | 3505.5  | 3869.1   | 2711.3   |
| hsa-let-7f-5p     | 13067.8  | 15764.4  | 9498.2   | 10322    | 8570.2   | 12909.7  | 8836.5  | 9914.3   | 6440.9   |
| hsa-let-7f-5p     | 13130    | 15781    | 9485     | 10252.3  | 8594.9   | 12927.1  | 8831.6  | 9904.2   | 6433.9   |
| hsa-let-7g-5p     | 805.6    | 1557.8   | 565.9    | 924.6    | 439.7    | 653.9    | 963.4   | 1163.7   | 385.8    |
| hsa-let-7i-5p     | 3495.6   | 3719.9   | 3085.6   | 2339.1   | 2517.7   | 2830.2   | 2926.6  | 4479.9   | 2389.8   |
| hsa-miR-100-5p    | 175      | 158.7    | 134      | 227.2    | 95.6     | 122.8    | 82.4    | 170.1    | 74.9     |
| hsa-miR-101-3p    | 711      | 578.2    | 828.8    | 805.9    | 356.1    | 334.7    | 408.5   | 582.7    | 285.8    |
| hsa-miR-101-3p    | 730.1    | 598.7    | 850      | 855.7    | 381.9    | 334.7    | 432.9   | 647.2    | 291.9    |
| hsa-miR-103a-3p   | 1869.3   | 3163.6   | 1375.7   | 1384.6   | 1064.3   | 2850.1   | 2077.9  | 2190.6   | 1407.4   |
| hsa-miR-103a-3p   | 1869.5   | 3163.6   | 1375.7   | 1394.7   | 1074.2   | 2850.1   | 2077.9  | 2190.6   | 1407.4   |
| hsa-miR-106b-3p   | 37.7     | 136.3    | 54.3     | 22.5     | 54.1     | 104.8    | 70.2    | 79.4     | 94.8     |
| hsa-miR-107       | 307.7    | 611.9    | 298.5    | 242.2    | 162.4    | 598.4    | 314.3   | 378.4    | 118.5    |
| hsa-miR-10a-5p    | 47752.7  | 30423.9  | 43826.1  | 41958.6  | 43275.7  | 53358.6  | 42483.3 | 33140.9  | 49844.1  |
| hsa-miR-10b-5p    | 375699   | 249858.9 | 496967.7 | 577786.3 | 641228.8 | 500173.2 | 588847  | 509664.1 | 646598.3 |
| hsa-miR-125a-5p   | 439.4    | 440.9    | 396.2    | 194.7    | 134.2    | 198.2    | 151.8   | 78.9     | 169.3    |
| hsa-miR-125b-2-3p | 378.2    | 380.4    | 335.2    | 48.3     | 99.5     | 228.1    | 135     | 99.5     | 72.8     |
| hsa-miR-1307-3p   | 276      | 624.1    | 326.2    | 255.3    | 211.8    | 459.7    | 281.5   | 249.5    | 231.4    |
| hsa-miR-141-3p    | 159      | 320.3    | 142.7    | 71.1     | 153.8    | 79.2     | 239.1   | 280.6    | 137.5    |
| hsa-miR-146a-5p   | 61.2     | 162.9    | 108.6    | 17.6     | 67.2     | 82.9     | 73.2    | 132.4    | 25.5     |
| hsa-miR-146b-5p   | 3154.2   | 2890.8   | 2731.8   | 2357.9   | 2527     | 2897.1   | 1820.5  | 2167.4   | 2321.1   |
| hsa-miR-148a-5p   | 685.3    | 846      | 239.7    | 323.4    | 313.8    | 459.1    | 349.4   | 888.3    | 171.4    |
| hsa-miR-148a-3p   | 6773.7   | 9253.9   | 2980.2   | 2237     | 1649.4   | 2286.2   | 2288.5  | 3032.9   | 1268.5   |
| hsa-miR-151a-3p   | 4205     | 4274.3   | 4187.2   | 2294.6   | 3323     | 5087.9   | 5075.8  | 3789.7   | 4475.2   |
| hsa-miR-155-5p    | 413.5    | 1258.6   | 66.2     | 79       | 119      | 68.4     | 116.7   | 187.7    | 66.1     |
| hsa-miR-181a-5p   | 11000.4  | 9702.2   | 15243.3  | 7930     | 7362.3   | 10382.9  | 10339.6 | 10286.1  | 6925     |
| hsa-miR-181a-2-3p | 96.7     | 345.5    | 157.1    | 168.5    | 113.8    | 162.3    | 242.2   | 98.7     | 48.8     |
| hsa-miR-181a-5p   | 11000.4  | 9702.2   | 15243.3  | 7930     | 7362.3   | 10382.9  | 10339.6 | 10286.1  | 6925     |
| hsa-miR-181b-5p   | 941.9    | 1358.4   | 1280.6   | 683.1    | 561.5    | 1070     | 810.9   | 1586.4   | 431.4    |
| hsa-miR-181b-5p   | 955.1    | 1377.5   | 1280.6   | 683.1    | 561.5    | 1070     | 820.8   | 1586.4   | 431.4    |
| hsa-miR-181c-5p   | 211.4    | 86.4     | 177.4    | 53.9     | 324.8    | 103.7    | 95.4    | 241.2    | 279.9    |
| hsa-miR-181d-5p   | 107.4    | 117.6    | 67.8     | 116      | 142.4    | 26.8     | 103.7   | 141.2    | 114.1    |
| hsa-miR-182-5p    | 4281.3   | 5683.8   | 3110     | 4836.6   | 2879.7   | 4052.3   | 4799.3  | 4957.8   | 3889.7   |
| hsa-miR-183-5p    | 1176.5   | 908.1    | 1558.9   | 2711.6   | 679.4    | 977.2    | 1234.2  | 952.8    | 537.3    |
| hsa-miR-186-5p    | 365.1    | 533.1    | 214.3    | 181.6    | 205.6    | 300.5    | 206     | 361.3    | 108.2    |
| hsa-miR-191-5p    | 3161.6   | 3091.2   | 2381.9   | 1218.1   | 1312.8   | 2396.7   | 2912.5  | 1930.2   | 2174.9   |
| hsa-miR-192-5p    | 2203.5   | 2416.6   | 1868.7   | 785.7    | 875      | 1372.5   | 1280.8  | 1639     | 461.8    |
| hsa-miR-196a-5p   | 716      | 609.9    | 726.3    | 232.1    | 421.2    | 630      | 466.9   | 374.5    | 438.4    |
| hsa-miR-196a-5p   | 930.2    | 897.5    | 886      | 274.4    | 557.8    | 808.9    | 581.7   | 502.1    | 525.6    |
| hsa-miR-200a-5p   | 65.4     | 155.3    | 113.1    | 74.9     | 89.1     | 219.9    | 111.8   | 100.9    | 59.4     |
| hsa-miR-200a-3p   | 896.5    | 1171.2   | 849.3    | 466.4    | 669.9    | 1287.9   | 1096.6  | 858.5    | 841.5    |
| hsa-miR-200b-3p   | 249.9    | 457.2    | 108.9    | 18.3     | 88.9     | 239.5    | 164     | 128.9    | 162.3    |
| hsa-miR-200c-3p   | 2874.5   | 4333.2   | 1541.2   | 1166.8   | 1192.9   | 3960.9   | 3510.9  | 2263.4   | 2159.9   |

|                  |         |         |         |         |         |         |         |         |         |
|------------------|---------|---------|---------|---------|---------|---------|---------|---------|---------|
| hsa-miR-203a-3p  | 587.8   | 780.8   | 541.8   | 259.8   | 250.9   | 857.3   | 1204.9  | 453.8   | 375.8   |
| hsa-miR-204-5p   | 3430.8  | 5399.4  | 2872.6  | 2444    | 3762.2  | 3440    | 3259.5  | 4541.2  | 2711.3  |
| hsa-miR-205-5p   | 81.5    | 296.6   | 157.8   | 69.6    | 12      | 167.5   | 175.8   | 101.7   | 32.5    |
| hsa-miR-21-5p    | 3941.3  | 8137.1  | 1968.9  | 1918.8  | 2101.3  | 5312.1  | 5891.6  | 11676   | 2060.5  |
| hsa-miR-22-3p    | 1649.7  | 1749    | 1718.6  | 680.5   | 597.1   | 1236.4  | 963.8   | 1012    | 733.5   |
| hsa-miR-221-3p   | 671.5   | 968.2   | 260.6   | 285.2   | 462.9   | 755     | 459.6   | 420.1   | 361.8   |
| hsa-miR-222-3p   | 668.2   | 740.3   | 326.2   | 564.1   | 340.9   | 471.7   | 379.1   | 260     | 496     |
| hsa-miR-25-3p    | 958.7   | 1693.9  | 520.6   | 698.9   | 439.9   | 1436.9  | 802.1   | 1424.2  | 395.4   |
| hsa-miR-26a-5p   | 24388.7 | 21129.4 | 20605   | 9156.7  | 12673.1 | 15471.9 | 14675.9 | 12926.1 | 15032.4 |
| hsa-miR-26a-5p   | 24388.7 | 21129.4 | 20605   | 9156.7  | 12673.3 | 15491.3 | 14675.9 | 12926.1 | 15032.4 |
| hsa-miR-26b-5p   | 4040.2  | 6926    | 2349.7  | 1070.6  | 1639.9  | 2601.2  | 2195.8  | 2962.7  | 1814.8  |
| hsa-miR-27b-3p   | 299.3   | 286.6   | 232.3   | 140     | 186.7   | 225     | 256.7   | 155.2   | 187.5   |
| hsa-miR-28-3p    | 4400.1  | 5798.5  | 3651.5  | 3108    | 2131.6  | 3072.9  | 3256.5  | 2598.8  | 2457.7  |
| hsa-miR-30a-3p   | 13399.2 | 16081.5 | 13298.8 | 9358.4  | 15411.2 | 18678.1 | 17633.3 | 26126.2 | 11802.3 |
| hsa-miR-30a-5p   | 49940.7 | 32363.5 | 58270.5 | 51403.9 | 56846   | 44796.9 | 48889.9 | 59147.9 | 52602.8 |
| hsa-miR-30c-5p   | 685.5   | 909.7   | 555.6   | 197.3   | 385.8   | 621.2   | 308.9   | 507.8   | 451     |
| hsa-miR-30c-2-3p | 734.7   | 530.7   | 724.7   | 498.6   | 174.4   | 308.7   | 272.3   | 476.6   | 150.6   |
| hsa-miR-30c-5p   | 685.5   | 909.7   | 555.6   | 197.3   | 385.8   | 621.2   | 308.9   | 507.8   | 451     |
| hsa-miR-30d-5p   | 5135.4  | 6379.9  | 4050.3  | 2957.5  | 3196.3  | 4974    | 3280.9  | 4073.8  | 3899.6  |
| hsa-miR-30e-5p   | 1076.3  | 932.7   | 826.5   | 912.6   | 677     | 771     | 599.6   | 514.3   | 740.6   |
| hsa-miR-30e-3p   | 1674.9  | 2171.1  | 1497.5  | 1879.1  | 2127    | 2891.4  | 2304.5  | 3183.7  | 1831.8  |
| hsa-miR-320a     | 5998    | 6912.2  | 3887.4  | 2226.5  | 2494.1  | 4528    | 2935.7  | 5534.4  | 2412.4  |
| hsa-miR-328-3p   | 190.3   | 295.2   | 102.8   | 70      | 69.2    | 141.3   | 142.3   | 89.5    | 138.6   |
| hsa-miR-375      | 9697.2  | 15119.7 | 189.9   | 1373    | 962.5   | 1847.9  | 2132.5  | 5413.4  | 1650.4  |
| hsa-miR-378a-3p  | 1176.5  | 1500.3  | 1370.6  | 533.4   | 689.7   | 1126.2  | 1127.1  | 1294.8  | 677.4   |
| hsa-miR-423-3p   | 483.6   | 751.6   | 438.3   | 216     | 229.2   | 379.7   | 327.3   | 395.1   | 164.7   |
| hsa-miR-423-5p   | 2237    | 1889.5  | 2070.1  | 1511.1  | 1234    | 1824.8  | 1369.3  | 1333    | 1515    |
| hsa-miR-486-5p   | 1321    | 768.2   | 1696.4  | 2528.9  | 394.8   | 424.7   | 569.1   | 793.6   | 195.7   |
| hsa-miR-486-5p   | 1325.1  | 774.4   | 1686.8  | 2493.7  | 394.8   | 424.9   | 569.1   | 793.6   | 196     |
| hsa-miR-532-5p   | 664     | 944     | 523.5   | 337.6   | 110.4   | 110.5   | 71.7    | 183.3   | 103.2   |
| hsa-miR-574-5p   | 319     | 596     | 137.2   | 109.3   | 102.7   | 405.9   | 174.3   | 220.6   | 73.1    |
| hsa-miR-577      | 144.5   | 145.3   | 101.2   | 141.9   | 109.1   | 147.8   | 185.4   | 263.5   | 126.6   |
| hsa-miR-660-5p   | 104     | 114.8   | 134.3   | 53.2    | 61.2    | 146.4   | 59.5    | 119.3   | 109.4   |
| hsa-miR-769-5p   | 112     | 142.9   | 100.9   | 138.9   | 125.9   | 72.9    | 149.1   | 222.3   | 91.3    |
| hsa-miR-9-5p     | 117.8   | 168     | 60.4    | 391.2   | 300.9   | 112.2   | 166.7   | 588.9   | 186.3   |
| hsa-miR-9-5p     | 117.8   | 168     | 60.4    | 391.2   | 300.9   | 112.2   | 166.7   | 588.9   | 186.3   |
| hsa-miR-92a-3p   | 18245.8 | 26609.6 | 14400.4 | 15437.1 | 1452.2  | 3132.7  | 1865.9  | 2337.5  | 1184.5  |
| hsa-miR-92a-3p   | 18857.4 | 27672   | 14700.8 | 15841.7 | 1528.9  | 3290.2  | 1914.3  | 2656.3  | 1267    |
| hsa-miR-92b-3p   | 555.2   | 544.7   | 547.6   | 174.4   | 456.2   | 421     | 578.6   | 570.5   | 633.8   |
| hsa-miR-93-5p    | 190.7   | 529.7   | 170     | 147.5   | 65.7    | 107.7   | 247.5   | 197.3   | 109.1   |
| hsa-miR-9-5p     | 117.8   | 168     | 60.4    | 391.2   | 300.9   | 112.2   | 166.7   | 588.9   | 186.3   |
| hsa-miR-941      | 190.9   | 325.7   | 129.2   | 181.6   | 152.3   | 317.9   | 85.4    | 211.8   | 127.2   |
| hsa-miR-941      | 190.9   | 325.7   | 129.2   | 181.6   | 152.3   | 317.9   | 85.4    | 211.8   | 127.2   |
| hsa-miR-941      | 190.9   | 325.7   | 129.2   | 181.6   | 152.3   | 317.9   | 85.4    | 211.8   | 127.2   |
| hsa-miR-941      | 190.9   | 325.7   | 129.2   | 181.6   | 152.3   | 317.9   | 85.4    | 211.8   | 127.2   |
| hsa-miR-941      | 190.9   | 325.7   | 129.2   | 181.6   | 152.3   | 317.9   | 85.4    | 211.8   | 127.2   |
| hsa-miR-98-5p    | 979.6   | 1729    | 702.5   | 565.6   | 551.8   | 1290.5  | 916.9   | 1214.1  | 448.7   |
| hsa-miR-99a-5p   | 472.9   | 396.4   | 292.4   | 271.4   | 209.2   | 221.3   | 116     | 360.9   | 207.1   |
| hsa-miR-99b-5p   | 4929.5  | 2946.3  | 5716.2  | 3831.6  | 3525.3  | 3780.9  | 4040.7  | 2860.6  | 2756.9  |
| hsa-miR-148b-3p  | 229.4   | 366.4   | 105.1   | 289.4   | 56.3    | 160.9   | 98.4    | 288.1   | 38      |

|                  |       |       |       |       |       |       |       |       |      |
|------------------|-------|-------|-------|-------|-------|-------|-------|-------|------|
| hsa-miR-31-5p    | 69.2  | 163.1 | 74.2  | 6     | 38.2  | 105.7 | 268.5 | 184.2 | 92.4 |
| hsa-miR-425-5p   | 102.8 | 127.1 | 96.1  | 32.9  | 9.5   | 60.4  | 72.1  | 104.4 | 72.8 |
| hsa-miR-140-3p   | 260.1 | 403.6 | 325.5 | 207   | 68.1  | 115.6 | 8.4   | 163.6 | 25.2 |
| hsa-miR-151a-5p  | 61.8  | 63.9  | 50.1  | 0     | 28.6  | 164.1 | 77    | 139   | 62   |
| hsa-miR-151b     | 61.8  | 63.9  | 50.1  | 0     | 28.6  | 164.1 | 77    | 139   | 62   |
| hsa-miR-152-3p   | 83.3  | 79.8  | 68.5  | 46.8  | 40    | 40.2  | 21.4  | 79.4  | 88.6 |
| hsa-miR-23b-3p   | 35.5  | 127.9 | 27.3  | 20.2  | 35.2  | 132.7 | 67.1  | 230.2 | 32.2 |
| hsa-miR-24-3p    | 71.9  | 69.1  | 81.3  | 0     | 23.2  | 17.1  | 42.7  | 69.3  | 33.3 |
| hsa-miR-24-3p    | 71.9  | 69.1  | 81.3  | 0     | 23.4  | 17.1  | 42.7  | 69.3  | 33.3 |
| hsa-miR-421      | 23.3  | 79.6  | 28.6  | 21    | 67    | 31.3  | 101.5 | 142.5 | 41.8 |
| hsa-miR-744-5p   | 41.7  | 83.8  | 73.9  | 24.3  | 19.6  | 71.8  | 99.6  | 46.9  | 29.3 |
| hsa-miR-16-5p    | 31.9  | 42.5  | 62.7  | 1.1   | 14.6  | 56.1  | 1.9   | 0.9   | 103  |
| hsa-miR-16-5p    | 31.9  | 42.5  | 62.7  | 1.1   | 14.6  | 56.1  | 1.9   | 0.9   | 103  |
| hsa-miR-196b-5p  | 244.9 | 359.4 | 178.4 | 60.6  | 56.9  | 48.7  | 0     | 56.1  | 36   |
| hsa-miR-363-3p   | 140.5 | 206.8 | 46.9  | 46.4  | 41.7  | 91.7  | 24.4  | 94.3  | 60.8 |
| hsa-miR-574-3p   | 105.8 | 259.1 | 54    | 0     | 47.5  | 259.2 | 140.7 | 46    | 19.3 |
| hsa-miR-891a-5p  | 153.2 | 311.3 | 0.3   | 422.6 | 230.9 | 243   | 32.8  | 355.2 | 208  |
| hsa-miR-99b-3p   | 65.6  | 71.6  | 53.3  | 31.4  | 18.7  | 157.5 | 53    | 92.5  | 34.2 |
| hsa-miR-1180-3p  | 103.2 | 68.3  | 108.3 | 0     | 30.9  | 78.6  | 64.1  | 68.8  | 52.9 |
| hsa-miR-30b-5p   | 40.3  | 63.5  | 31.8  | 6.7   | 32.4  | 108.8 | 45.4  | 42.5  | 23.4 |
| hsa-miR-30b-3p   | 17.3  | 43.7  | 16.7  | 12.4  | 34.6  | 53.8  | 70.2  | 97.3  | 59.7 |
| hsa-miR-4446-3p  | 53.4  | 41.1  | 15.8  | 17.6  | 21.5  | 25.1  | 111.8 | 103.9 | 22.2 |
| hsa-miR-340-5p   | 47.4  | 60.3  | 16.1  | 15    | 14.6  | 38.7  | 21.4  | 26.8  | 0    |
| hsa-miR-598-3p   | 66.4  | 77.2  | 39.2  | 27.3  | 15    | 69.5  | 29.4  | 38.6  | 0    |
| hsa-miR-210-3p   | 61.2  | 55.5  | 41.8  | 16.1  | 8.4   | 74.1  | 0     | 20.2  | 11.7 |
| hsa-miR-28-5p    | 51    | 59.9  | 8.4   | 14.2  | 19.8  | 80.6  | 98.8  | 15.8  | 14   |
| hsa-miR-3615     | 25.3  | 53.9  | 58.8  | 41.2  | 0     | 29.6  | 70.6  | 92.5  | 31.3 |
| hsa-miR-374a-3p  | 33.5  | 21    | 10.6  | 11.6  | 50.3  | 0     | 63.3  | 33.3  | 36.6 |
| hsa-miR-425-3p   | 18.3  | 47.5  | 28    | 0     | 44.5  | 32.2  | 17.2  | 27.2  | 13.2 |
| hsa-miR-7706     | 7.6   | 32.1  | 49.2  | 7.9   | 44.5  | 17.9  | 0     | 36    | 32.5 |
| hsa-miR-130a-3p  | 56.2  | 49.7  | 103.2 | 0     | 83.6  | 13.1  | 33.2  | 0     | 36.9 |
| hsa-miR-184      | 152   | 62.3  | 168.4 | 110.4 | 31.1  | 52.4  | 16.8  | 56.6  | 0    |
| hsa-miR-19b-3p   | 27.5  | 72.2  | 7.4   | 34.1  | 31.4  | 36.2  | 29.4  | 25    | 22.2 |
| hsa-miR-19b-3p   | 27.5  | 72.2  | 7.4   | 34.1  | 31.4  | 36.2  | 29.4  | 25    | 22.2 |
| hsa-miR-429      | 35.3  | 141.5 | 26.7  | 32.9  | 9     | 37    | 19.8  | 133.3 | 14   |
| hsa-miR-92b-5p   | 15.3  | 25.1  | 18    | 0     | 23.2  | 20.2  | 0     | 20.2  | 11.4 |
| hsa-miR-342-3p   | 39.1  | 52.1  | 64.3  | 18    | 45.3  | 22.8  | 0     | 0     | 25.5 |
| hsa-miR-500a-3p  | 138.9 | 204   | 207   | 102.2 | 15    | 10.8  | 16    | 0     | 0    |
| hsa-miR-181a-3p  | 14.8  | 37.5  | 30.9  | 21.3  | 9.2   | 15.7  | 0     | 0     | 12.3 |
| hsa-miR-320b     | 28.1  | 43.9  | 30.5  | 35.9  | 30.1  | 13.4  | 38.1  | 28.9  | 2.3  |
| hsa-miR-361-5p   | 30.9  | 50.9  | 18    | 19.1  | 20.6  | 16.2  | 0     | 75.4  | 40.4 |
| hsa-miR-424-3p   | 28.3  | 37.5  | 66.2  | 10.9  | 45.1  | 71.5  | 38.9  | 81.6  | 0    |
| hsa-miR-92a-1-5p | 45.4  | 73.8  | 18.3  | 37.8  | 27.7  | 81.7  | 0     | 44.7  | 34.2 |
| hsa-miR-320b     | 28.1  | 62.3  | 30.5  | 35.9  | 30.1  | 3.4   | 37.8  | 28.5  | 2.3  |
| hsa-miR-345-5p   | 69.2  | 83.6  | 26    | 0     | 24.1  | 28.2  | 2.7   | 0     | 0    |
| hsa-miR-584-5p   | 25.9  | 110.6 | 53.7  | 16.8  | 4.9   | 41.6  | 117.9 | 32    | 0    |
| hsa-miR-671-3p   | 55.4  | 45.9  | 0     | 0     | 0     | 17.4  | 38.9  | 21.1  | 5.6  |
| hsa-miR-1226-5p  | 22.5  | 33.7  | 10.6  | 71.9  | 12.5  | 0     | 19.8  | 0     | 0    |
| hsa-miR-1270     | 16.5  | 17.6  | 0     | 0     | 17.2  | 38.7  | 0     | 28.9  | 0    |
| hsa-miR-218-5p   | 10.6  | 13.8  | 6.4   | 44.2  | 12.7  | 38.2  | 0     | 20.2  | 9.1  |
| hsa-miR-218-5p   | 10.6  | 13.8  | 6.4   | 44.2  | 12.7  | 38.2  | 0     | 20.2  | 9.1  |

|                  |      |       |       |       |      |      |      |      |      |
|------------------|------|-------|-------|-------|------|------|------|------|------|
| hsa-miR-29a-3p   | 15.1 | 34.9  | 8.4   | 0     | 12   | 39.9 | 24   | 31.1 | 0    |
| hsa-miR-342-5p   | 41.9 | 64.9  | 51.4  | 32.2  | 0    | 49.8 | 0    | 0    | 30.1 |
| hsa-miR-1468-5p  | 23.9 | 17.2  | 11.9  | 16.8  | 0    | 0    | 0    | 0    | 0    |
| hsa-miR-29c-3p   | 22.1 | 23.5  | 11.9  | 18.3  | 2.2  | 28.8 | 22.1 | 11   | 24.6 |
| hsa-miR-324-5p   | 19.3 | 28.9  | 0     | 0     | 0    | 23.4 | 0    | 0    | 0    |
| hsa-miR-365b-5p  | 16.9 | 27.3  | 25.4  | 15.4  | 10.7 | 30.2 | 29.4 | 18   | 0    |
| hsa-miR-432-5p   | 9    | 101.4 | 100.3 | 0     | 0    | 72.6 | 42.3 | 63.1 | 10.8 |
| hsa-miR-99a-3p   | 19.9 | 26.9  | 27    | 0     | 0    | 8.5  | 28.6 | 21.5 | 0    |
| hsa-miR-10b-3p   | 32.3 | 8.2   | 19    | 40.8  | 18.3 | 19.9 | 18.3 | 0    | 58.8 |
| hsa-miR-194-5p   | 49.4 | 33.5  | 29.6  | 0     | 0    | 20.8 | 0    | 57.4 | 24.9 |
| hsa-miR-197-3p   | 15.3 | 36.3  | 14.5  | 0     | 6.4  | 17.4 | 18.3 | 14   | 9.4  |
| hsa-miR-132-3p   | 23.9 | 58.5  | 17    | 17.6  | 0    | 0    | 0    | 25.9 | 0    |
| hsa-miR-146b-3p  | 7.6  | 10    | 0     | 0     | 0    | 33.3 | 20.6 | 0    | 0    |
| hsa-miR-194-5p   | 49.2 | 33.3  | 28.9  | 0     | 0    | 20.8 | 0    | 57.4 | 24.9 |
| hsa-miR-365a-5p  | 19.1 | 14.6  | 0     | 18.7  | 20.2 | 0    | 19.5 | 69.7 | 0    |
| hsa-miR-484      | 27.5 | 28.9  | 15.1  | 0     | 15.5 | 17.7 | 0    | 37.3 | 9.9  |
| hsa-miR-128-3p   | 6.6  | 5.8   | 11.6  | 13.1  | 27.1 | 13.4 | 0    | 68.4 | 5.6  |
| hsa-miR-27b-5p   | 21.1 | 17.2  | 0     | 0     | 24.5 | 0    | 0    | 0    | 0    |
| hsa-miR-589-5p   | 13.8 | 25.5  | 9     | 20.2  | 0    | 0    | 6.1  | 19.7 | 0    |
| hsa-miR-125b-5p  | 9.6  | 10.6  | 6.8   | 0     | 17.2 | 0.3  | 0    | 40.3 | 9.4  |
| hsa-miR-125b-5p  | 9.6  | 10.6  | 6.8   | 0     | 17.2 | 0.3  | 0    | 40.3 | 9.4  |
| hsa-miR-128-3p   | 6.6  | 5.8   | 11.6  | 0     | 40   | 13.4 | 0    | 68.4 | 0    |
| hsa-miR-181c-3p  | 0.2  | 5     | 0     | 18    | 14   | 20.5 | 0    | 0    | 0    |
| hsa-miR-30d-3p   | 24.7 | 37.5  | 24.4  | 3.7   | 3.7  | 23.1 | 3.8  | 7.5  | 2.9  |
| hsa-miR-361-3p   | 28.5 | 44.1  | 15.4  | 16.8  | 0    | 0    | 19.8 | 37.3 | 14.6 |
| hsa-miR-501-3p   | 35.3 | 11    | 46.6  | 110.8 | 10.1 | 0    | 0    | 25   | 0    |
| hsa-miR-874-3p   | 55.2 | 38.5  | 8.7   | 15    | 5.2  | 17.4 | 0    | 0    | 0    |
| hsa-miR-130b-3p  | 7.4  | 30.5  | 22.5  | 15    | 0    | 20.2 | 0    | 0    | 0    |
| hsa-miR-200b-5p  | 13.8 | 10.8  | 7.7   | 14.6  | 0    | 0    | 0    | 0    | 13.2 |
| hsa-miR-204-3p   | 24.1 | 20    | 5.5   | 16.5  | 8.2  | 0.6  | 0    | 0    | 19.3 |
| hsa-miR-409-3p   | 0    | 22.5  | 27.3  | 71.9  | 18.3 | 35   | 30.9 | 0    | 12.9 |
| hsa-miR-7-5p     | 12   | 36.1  | 20.9  | 19.1  | 0    | 5.1  | 0    | 84.6 | 0    |
| hsa-miR-7-5p     | 12   | 36.1  | 20.9  | 19.1  | 0    | 5.1  | 0    | 84.6 | 0    |
| hsa-miR-7-5p     | 15   | 36.1  | 20.9  | 19.1  | 0    | 5.1  | 0    | 84.6 | 0    |
| hsa-miR-873-3p   | 24.1 | 9     | 40.5  | 16.1  | 26   | 0    | 0    | 0    | 21.9 |
| hsa-let-7a-3p    | 10.6 | 31.5  | 18.3  | 0     | 0    | 0    | 21.7 | 23.2 | 0    |
| hsa-let-7a-3p    | 10.6 | 31.5  | 18.3  | 0     | 0    | 0    | 21.7 | 23.2 | 0    |
| hsa-miR-1262     | 12.8 | 11.2  | 15.8  | 7.5   | 0    | 0    | 15.6 | 18   | 0    |
| hsa-miR-1269a    | 3.6  | 0     | 33.7  | 15.7  | 0    | 0    | 0    | 0    | 0    |
| hsa-miR-143-3p   | 8.2  | 0.6   | 34.1  | 83.5  | 29   | 2.3  | 0    | 89.9 | 52.9 |
| hsa-miR-3622a-5p | 0    | 4.2   | 16.4  | 0     | 9.9  | 0    | 0    | 0    | 14.6 |
| hsa-miR-449c-5p  | 20.9 | 31.1  | 38.2  | 0     | 0    | 0    | 0    | 0    | 0    |
| hsa-miR-92a-2-5p | 43.2 | 36.3  | 0     | 0     | 0    | 0    | 16.4 | 0    | 18.1 |
| hsa-miR-1307-5p  | 7.6  | 6.4   | 0     | 41.2  | 0    | 17.7 | 0    | 0    | 0    |
| hsa-miR-17-5p    | 11.8 | 17.4  | 19.3  | 0     | 0    | 0    | 0    | 0    | 0    |
| hsa-miR-20b-5p   | 15.3 | 14.4  | 0     | 0     | 0    | 0    | 0    | 0    | 0    |
| hsa-miR-30c-1-3p | 9.4  | 11.2  | 18    | 0.8   | 15.9 | 0.3  | 0.4  | 0    | 9.4  |
| hsa-miR-542-3p   | 17.7 | 0     | 24.1  | 0     | 24.1 | 0    | 0    | 0    | 0    |
| hsa-miR-642a-5p  | 5.4  | 4.8   | 12.9  | 19.8  | 0    | 0    | 0    | 3.5  | 18.7 |

|                   |      |      |      |      |      |      |      |      |      |
|-------------------|------|------|------|------|------|------|------|------|------|
| hsa-miR-6859-5p   | 13.6 | 3.2  | 0    | 31.4 | 16.3 | 0    | 0    | 0    | 0    |
| hsa-miR-6859-5p   | 13.6 | 3.2  | 0    | 31.4 | 16.3 | 0    | 0    | 0    | 0    |
| hsa-miR-6859-5p   | 13.6 | 3.2  | 0    | 31.4 | 16.3 | 0    | 0    | 0    | 0    |
| hsa-miR-6859-5p   | 13.6 | 3.2  | 0    | 31.4 | 16.3 | 0    | 0    | 0    | 0    |
| hsa-miR-877-5p    | 11.2 | 24.9 | 26.7 | 35.6 | 0    | 0    | 0    | 14.9 | 10.2 |
| hsa-miR-887-3p    | 42.2 | 19   | 34.1 | 0    | 0    | 48.4 | 0    | 0    | 0    |
| hsa-miR-128-1-5p  | 7.2  | 17.8 | 0    | 0    | 0    | 0    | 0    | 0    | 0    |
| hsa-miR-3158-3p   | 0    | 7.6  | 9.3  | 19.1 | 7.1  | 0    | 0    | 0    | 0    |
| hsa-miR-3158-3p   | 0    | 7.6  | 9.3  | 19.1 | 7.1  | 0    | 0    | 0    | 0    |
| hsa-miR-3605-5p   | 10.8 | 5    | 20.9 | 0    | 0    | 0    | 17.2 | 0    | 0    |
| hsa-miR-382-5p    | 0    | 25.7 | 8.4  | 38.2 | 0    | 0    | 0    | 0    | 0    |
| hsa-miR-4728-3p   | 4.6  | 15.6 | 0    | 0    | 8.2  | 16.8 | 21.4 | 24.1 | 9.1  |
| hsa-miR-629-5p    | 14   | 10.2 | 12.5 | 28.5 | 3.7  | 0    | 0    | 0    | 0    |
| hsa-miR-6863      | 15.7 | 4.4  | 9.3  | 0    | 9    | 0    | 0    | 26.3 | 0    |
| hsa-miR-760       | 9.4  | 11.4 | 0    | 11.2 | 8.4  | 0    | 15.3 | 35.5 | 0    |
| hsa-let-7b-3p     | 5    | 20   | 0    | 0    | 12.5 | 0    | 19.5 | 30.3 | 0    |
| hsa-miR-100-3p    | 0    | 13.4 | 12.2 | 14.6 | 0    | 0    | 0    | 28.1 | 10.8 |
| hsa-miR-127-3p    | 5    | 18.2 | 30.9 | 20.2 | 1.7  | 4.8  | 0    | 20.6 | 2.1  |
| hsa-miR-151b      | 8.6  | 10   | 9    | 0    | 6    | 14.8 | 27.1 | 18   | 0    |
| hsa-miR-194-3p    | 2.2  | 24.5 | 20.6 | 0    | 0    | 16.8 | 0    | 28.5 | 0    |
| hsa-miR-20a-5p    | 4.8  | 6.4  | 0    | 0    | 0    | 0    | 0    | 53.1 | 0    |
| hsa-miR-2110      | 0    | 19.6 | 18   | 0    | 0    | 8.8  | 0    | 0    | 9.7  |
| hsa-miR-489-3p    | 0    | 6.2  | 0    | 0    | 0    | 0    | 16.4 | 0    | 0    |
| hsa-miR-509-3p    | 32.3 | 11.6 | 27   | 0    | 18.7 | 0    | 0    | 0    | 0    |
| hsa-miR-509-3p    | 32.3 | 11.6 | 27   | 0    | 18.7 | 0    | 0    | 0    | 0    |
| hsa-miR-509-3p    | 32.3 | 11.6 | 27   | 0    | 18.7 | 0    | 0    | 0    | 0    |
| hsa-miR-548az-5p  | 0    | 0.6  | 28.3 | 18   | 8.6  | 0    | 0.4  | 25   | 8.8  |
| hsa-miR-10a-3p    | 12.6 | 11.2 | 0    | 0    | 0    | 16.5 | 0    | 0    | 0    |
| hsa-miR-125b-1-3p | 9.4  | 6.8  | 17   | 9.7  | 6.7  | 0    | 38.1 | 0.9  | 7    |
| hsa-miR-1269b     | 0    | 0    | 0    | 0    | 10.1 | 0    | 0    | 0    | 0    |
| hsa-miR-1304-3p   | 4.4  | 9.4  | 22.5 | 30.3 | 0    | 16   | 0    | 0    | 0    |
| hsa-miR-193b-5p   | 22.3 | 9.4  | 0    | 15.7 | 0    | 0    | 0    | 14.9 | 0    |
| hsa-miR-195-3p    | 13   | 11.2 | 0    | 0.8  | 0    | 0    | 0    | 0    | 0    |
| hsa-miR-23a-3p    | 10.8 | 2.6  | 0    | 0    | 0.2  | 0    | 0.4  | 49.1 | 14.3 |
| hsa-miR-29b-3p    | 12.8 | 10.8 | 10.9 | 0    | 0    | 0    | 0    | 0    | 0    |
| hsa-miR-29b-3p    | 12.8 | 10.8 | 10.9 | 0    | 0    | 0    | 0    | 0    | 0    |
| hsa-miR-29b-2-5p  | 5.4  | 0    | 0    | 0    | 0    | 15.4 | 0    | 0    | 12.6 |
| hsa-miR-301a-3p   | 5.2  | 1.8  | 7.4  | 14.2 | 4.1  | 0    | 0    | 0    | 0    |
| hsa-miR-335-3p    | 9.4  | 12.8 | 16.7 | 0    | 0.2  | 0    | 0    | 0    | 0.9  |
| hsa-miR-34a-5p    | 10.6 | 16.2 | 8.4  | 0    | 5.6  | 19.7 | 22.1 | 0    | 0    |
| hsa-miR-3605-3p   | 0    | 11.6 | 0    | 8.6  | 0.2  | 0    | 0    | 0    | 0    |
| hsa-miR-452-5p    | 0    | 4.8  | 11.3 | 0    | 0    | 0    | 18.3 | 0    | 0    |
| hsa-miR-455-5p    | 0    | 8.2  | 0    | 0    | 0    | 32.8 | 0    | 0    | 0    |
| hsa-miR-664a-5p   | 8.8  | 6.8  | 11.6 | 0    | 0    | 0    | 21   | 0    | 0    |
| hsa-miR-708-5p    | 0    | 9.8  | 0    | 21.3 | 0    | 0    | 22.9 | 10.1 | 0    |
| hsa-miR-769-3p    | 0    | 9    | 7.4  | 0    | 0    | 17.1 | 0    | 0    | 22.8 |
| hsa-miR-892a      | 0    | 11.6 | 0    | 0    | 17.2 | 16.8 | 0    | 0    | 0    |
| hsa-miR-106a-5p   | 4    | 15.8 | 0    | 0    | 0    | 0    | 0    | 0    | 12.9 |
| hsa-miR-148b-5p   | 0    | 6.8  | 0    | 0    | 0    | 3.1  | 0    | 29.4 | 0    |
| hsa-miR-193b-3p   | 9.8  | 6.4  | 15.8 | 0    | 0    | 0    | 0    | 0    | 11.4 |
| hsa-miR-3065-3p   | 10   | 10   | 4.2  | 0    | 0    | 0    | 0    | 0    | 11.7 |
| hsa-miR-330-5p    | 0    | 0    | 0    | 0    | 0    | 17.1 | 0    | 0    | 0    |
| hsa-miR-582-3p    | 0    | 10.4 | 9.3  | 37.4 | 9.2  | 0    | 0    | 0    | 0    |
| hsa-miR-625-3p    | 0    | 5.4  | 14.8 | 0    | 0    | 17.9 | 0    | 0    | 9.7  |
| hsa-miR-939-5p    | 22.3 | 4    | 0    | 0    | 0    | 0    | 28.2 | 0    | 0    |

S7 Table
